# Supplementary material for: Recruitment and Baseline Characteristics of Participants in the Social, Emotional, and Economic Empowerment Through Knowledge of Group Support Psychotherapy Study (SEEK-GSP): Cluster Randomized Controlled Trial
Source: PubMed Central journal article supplement (PMC6682267; doi:10.2196/11560), 2019-01-03
Supplement: resprot_v8i1e11560_app1.pdf [file resprot_v8i1e11560_app1.pdf]

## SUPERVISION FORM

STUDY ID OF TRAINEE..... QUALIFICATION.....

SUPERVISOR ID/ NAME..... QUALIFICATION.....

HEALTH CENTER.....

GROUP SUPPORT PSYCHOTHERAPY SESSION TITLE and NO: .....

**Health Worker Supervision Checklist. Please refer to the supervisor’s guide then tick the appropriate box  
If a particular skill is not applicable to the group session indicate N/A**

| Counseling skills                                                                                                              | Needs improvement | Done partially | Done well |
|--------------------------------------------------------------------------------------------------------------------------------|-------------------|----------------|-----------|
| 1. The health worker is able to obtain and address group members expectations from the group session                           |                   |                |           |
| 2. The health worker demonstrates appropriate facial expression, eye contact, gestures & body language                         |                   |                |           |
| 3. The health worker asks appropriate questions, Uses summarizing and clarifying statements                                    |                   |                |           |
| 4. The health worker is able to build rapport & encourages group members to express themselves                                 |                   |                |           |
| 5. The health worker demonstrates ability to explore and normalize group members feelings                                      |                   |                |           |
| 6. The health worker is able to demonstrate EMPATHY, WARMTH & GENUINENESS                                                      |                   |                |           |
| 7. The health worker is able to explore members own explanations regarding the cause of their problems                         |                   |                |           |
| 8. The health worker is able to explore the group members social support networks                                              |                   |                |           |
| 9. The health worker is able to promote realistic hope for change                                                              |                   |                |           |
| 10. The health worker is able to promote confidentiality in each group session                                                 |                   |                |           |
| 11. The health worker is able to explore group members feelings & thoughts of self harm and harm to others                     |                   |                |           |
| 12. The health worker is able to encourage feedback from group members regarding any advice given                              |                   |                |           |
| 13. The health worker is able to explore the group members own coping mechanisms and advise on other effective ways of coping. |                   |                |           |
| 14. The health worker is able to use the group support psychotherapy manual effectively                                        |                   |                |           |
