# Supplementary material for: Recruitment and Baseline Characteristics of Participants in the Social, Emotional, and Economic Empowerment Through Knowledge of Group Support Psychotherapy Study (SEEK-GSP): Cluster Randomized Controlled Trial
Source: PubMed Central journal article supplement (PMC6682267; doi:10.2196/11560), 2019-01-03
Supplement: resprot_v8i1e11560_app4.pdf [file resprot_v8i1e11560_app4.pdf]

## PROTOCOL DEVIATIONS

**Table 11: Off-Protocol Events by Site**

| <b>Off-Protocol Events</b>                                                      | <b>Gulu<br/>(N=379)<br/>N(%)</b> | <b>Kitgum<br/>(N=375)<br/>N(%)</b> | <b>Pader<br/>(N=386)<br/>N(%)</b> | <b>Total<br/>(N=1140)</b> |
|---------------------------------------------------------------------------------|----------------------------------|------------------------------------|-----------------------------------|---------------------------|
| Participants enrolled outside the target period                                 | 8(2.11)                          | 10(2.67)                           | 5(1.30)                           | 23(2.02)                  |
| Number of health centers that did not meet the target enrolment ( <b>N=30</b> ) | 8(80)                            | 5(50)                              | 3(30)                             | 16(53.33)                 |
| Enrolled participants did not meet criteria for major depression                | 1(7.69)                          | 7(53.85)                           | 5(38.46)                          | 13(1.14)                  |
| Enrolled participants with high suicide risk                                    | 4(12.50)                         | 5(15.63)                           | 23(71.88)                         | 32(2.81)                  |
| Did not have baseline assessments                                               | 12(57.14)                        | 4(19.05)                           | 5(23.81)                          | 21(1.84)                  |
| Lost to follow up after end of treatment                                        | 37(57.81)                        | 11(17.19)                          | 16(25)                            | 64(5.61)                  |
| <b>Group session attendance of trial participants</b>                           |                                  |                                    |                                   |                           |
| Did not attend any group session                                                | 28(7.39)                         | 12(3.20)                           | 8(2.07)                           | 48(4.21)                  |
| Attended one group session                                                      | 3(0.79)                          | 1(0.27)                            | 1(0.26)                           | 5(0.44)                   |
| Attended two group sessions                                                     | 0(0.00)                          | 2(0.53)                            | 3(0.78)                           | 5(0.44)                   |
| Attended three group sessions                                                   | 3(0.79)                          | 1(0.27)                            | 1(0.26)                           | 5(0.44)                   |
| Attended four group sessions                                                    | 7(1.85)                          | 0(0.00)                            | 7(1.81)                           | 14(1.23)                  |
| Attended five group sessions                                                    | 5(1.32)                          | 3(0.80)                            | 6(1.55)                           | 14(1.23)                  |
| Attended six group sessions                                                     | 11(2.90)                         | 11(2.93)                           | 19(4.92)                          | 41(3.60)                  |
| Attended seven group sessions                                                   | 22(5.80)                         | 19(5.07)                           | 15(3.89)                          | 56(4.91)                  |
| Attended eight group sessions                                                   | 300(79.16)                       | 326(86.93)                         | 326(84.46)                        | 952(83.51)                |
